# Supplementary material
Source: Springer Nature journal article supplement (https://publikationen.ub.uni-frankfurt.de/opus4/files/35269/13104_2014_3224_MOESM5_ESM.pdf)
Supplement: MOESM5 [file 13104_2014_3224_MOESM5_ESM.pdf]

**Suppl. Table 4.** Influence of PLX4032 (20µM) or PLX4720 (20µM) on the vincristine (substrate of ABCB1 and ABCC1) or mitoxantrone (substrate of ABCG2) concentrations that reduce the cell viability by 50% (IC<sub>50</sub>) in the BRAF wild-type melanoma cell lines IPC298 and SK-MEL-30 that both express ABCB1, ABCC1, and ABCG2.

|                | IC <sub>50</sub><br>vincristine<br>(ng/ml) | IC <sub>50</sub> vincristine in the<br>presence of<br>PLX4032/PLX4720 | fold<br>sensitisation <sup>1</sup> | IC <sub>50</sub><br>mitoxantrone<br>(ng/mL) | IC <sub>50</sub> mitoxantrone in<br>the presence of<br>PLX4032/PLX4720 | fold<br>sensitisation <sup>2</sup> |
|----------------|--------------------------------------------|-----------------------------------------------------------------------|------------------------------------|---------------------------------------------|------------------------------------------------------------------------|------------------------------------|
| <b>PLX4032</b> |                                            |                                                                       |                                    |                                             |                                                                        |                                    |
| IPC298         | 2.74 ± 0.39                                | 0.54 ± 0.07 <sup>3</sup> (73 ± 7) <sup>4</sup>                        | 5.11                               | 1.54 ± 0.45                                 | 0.79 ± 0.08 <sup>6</sup> (75 ± 8) <sup>4</sup>                         | 1.96                               |
| SK-MEL-30      | 4.57 ± 1.49                                | 0.42 ± 0.07 <sup>3</sup> (85 ± 9) <sup>4</sup>                        | 10.82                              | 3.44 ± 0.44                                 | 1.73 ± 0.62 <sup>6</sup> (79 ± 11) <sup>4</sup>                        | 1.99                               |
| <b>PLX4720</b> |                                            |                                                                       |                                    |                                             |                                                                        |                                    |
| IPC298         | 2.74 ± 0.39                                | 0.83 ± 0.08 <sup>3</sup> (57 ± 10) <sup>5</sup>                       | 3.32                               | 1.54 ± 0.45                                 | 0.69 ± 0.25 <sup>6</sup> (71 ± 13) <sup>5</sup>                        | 2.25                               |
| SK-MEL-30      | 4.57 ± 1.49                                | 1.50 ± 0.62 <sup>3</sup> (73 ± 5) <sup>5</sup>                        | 3.04                               | 3.44 ± 0.44                                 | 1.61 ± 0.08 <sup>6</sup> (77 ± 9) <sup>5</sup>                         | 2.14                               |

<sup>1</sup> relative to vincristine alone

<sup>2</sup> relative to mitoxantrone alone

<sup>3</sup> p < 0.05 relative to vincristine alone

<sup>4</sup> cell viability in the presence of PLX4032 alone

<sup>5</sup> cell viability in the presence of PLX4720 alone

<sup>6</sup> p < 0.05 relative to mitoxantrone alone
